# Supplementary material
Source: PubMed Central journal article supplement (PMC6531856)
Supplement: NIHMS1019481-supplement-supplemental.pdf [file NIHMS1019481-supplement-supplemental.pdf]

## Supplementary Appendix: Comparison of cognitive scores in the HAALSI vs. the HRS

The distribution of cognitive scores in the HAALSI was compared to that of the 2012 HRS, in order to benchmark the absolute cognitive performance of the HAALSI study population against that of the older population of the United States. The HRS total cognitive score ranges from 0 to 35, and includes the same time orientation and immediate and delayed word recall test as HAALSI, in addition to serial subtraction of 7s starting from 100, the ability to count backwards from 20 to 1, and object recognition (e.g. cactus). These latter tests were not included in HAALSI, as they were deemed inappropriate due to the cultural and educational differences between the contexts. In order to benchmark the absolute cognitive function of the HAALSI study population compared to the 2012 HRS study population (n=10 422), we compared the distributions of the composite scores for the three measures that were consistent between the HAALSI and HRS for all non-proxy participants: time orientation, immediate recall, and delayed recall (range of 0 to 24 in both studies). HAALSI respondents aged  $\geq 50$  years were included, to match the age range of the HRS sample.

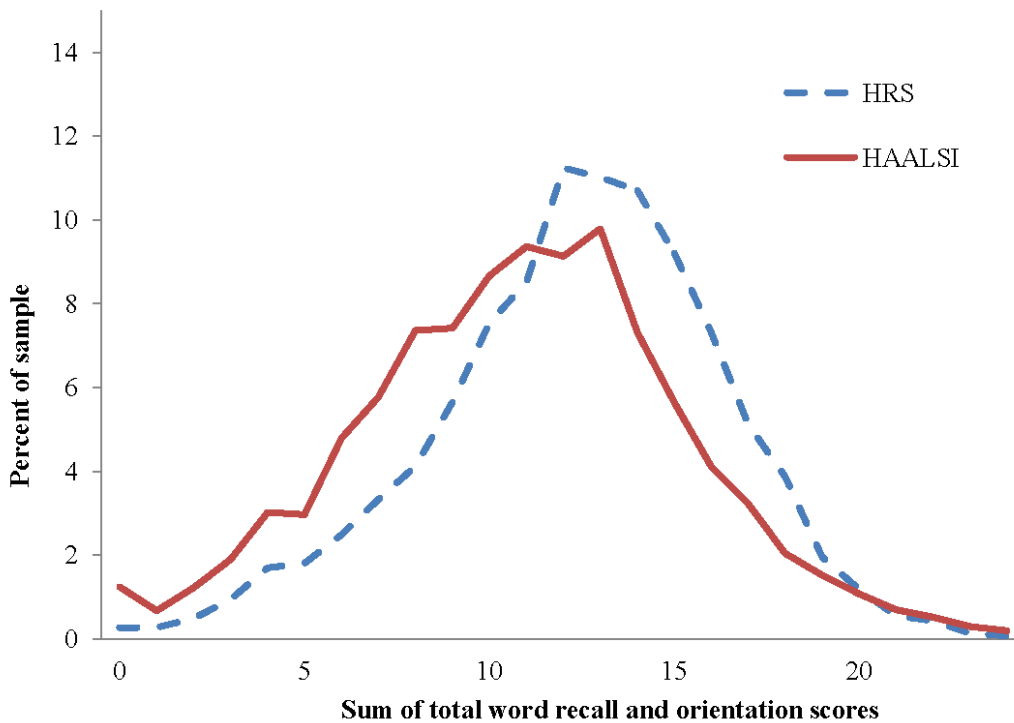

**Supplementary Figure.** Distribution of cognitive scores in the HAALSI (2015) and the HRS (2012)
